# Supplementary material for: Multi-task snake optimization algorithm for global optimization and planar kinematic arm control problem
Source: PeerJ journal article supplement (doi:10.7717/peerj-cs.2688), 2025-02-11
Supplement: All_Supplementary_Images.pdf [file All_Supplementary_Images.pdf]

**Supplemental Figure S1** Convergence curve plots for 9 sets of multitask benchmark test functions

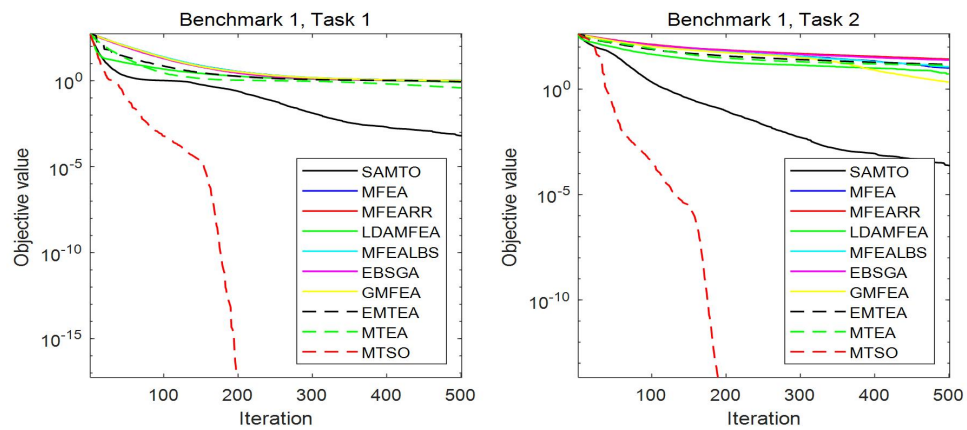

(a)

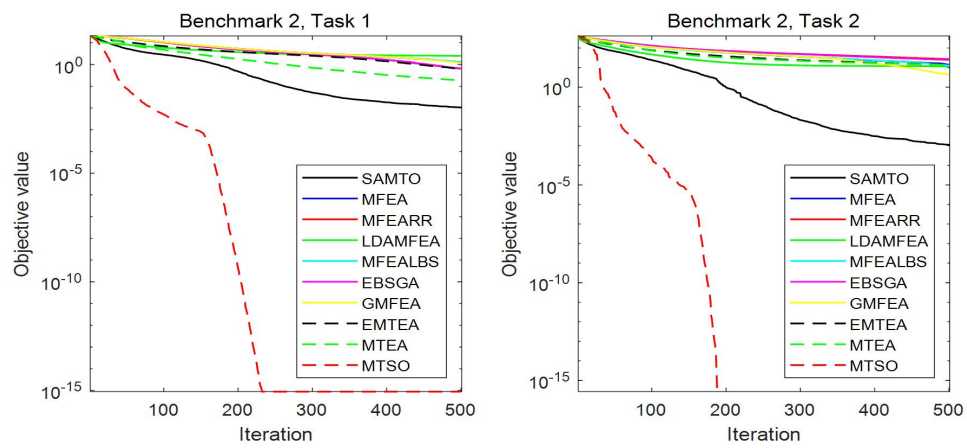

(b)

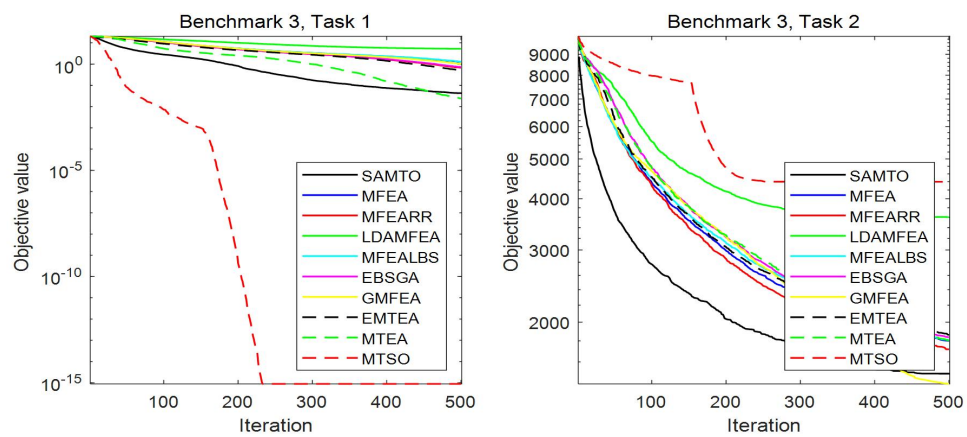

(c)

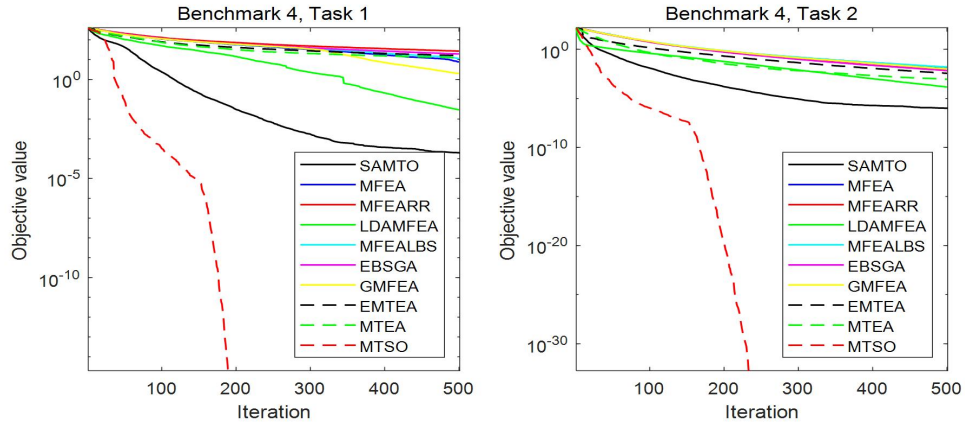

(d)

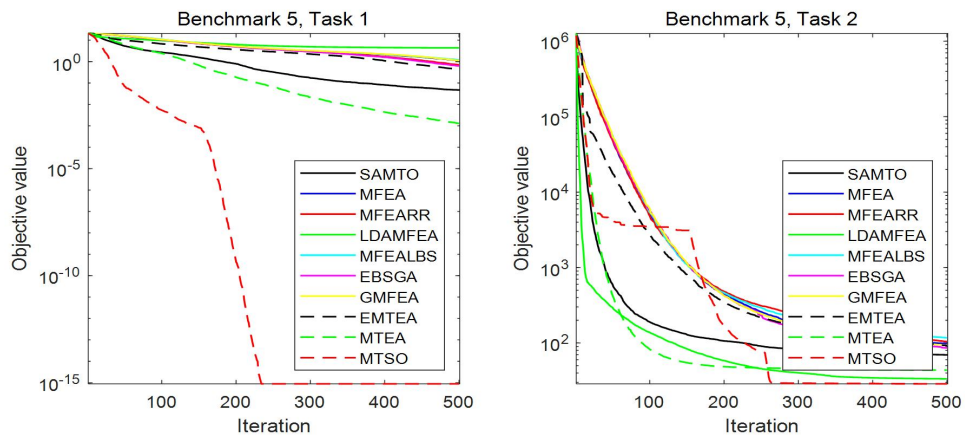

(e)

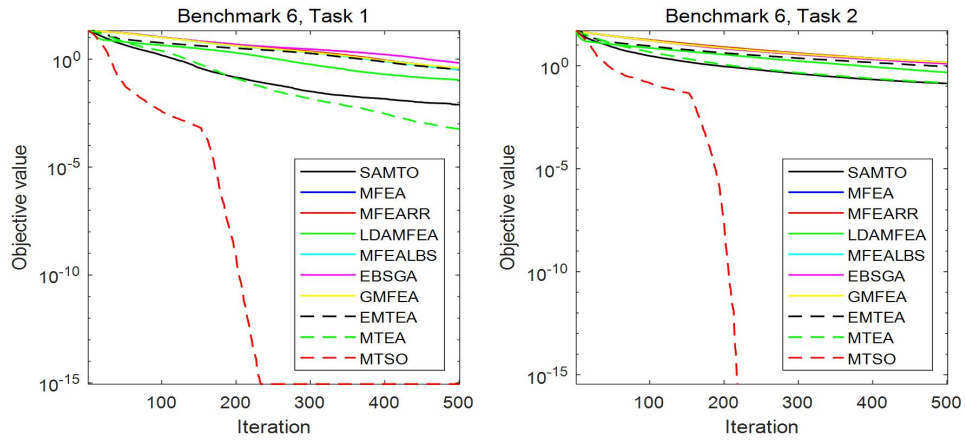

(f)

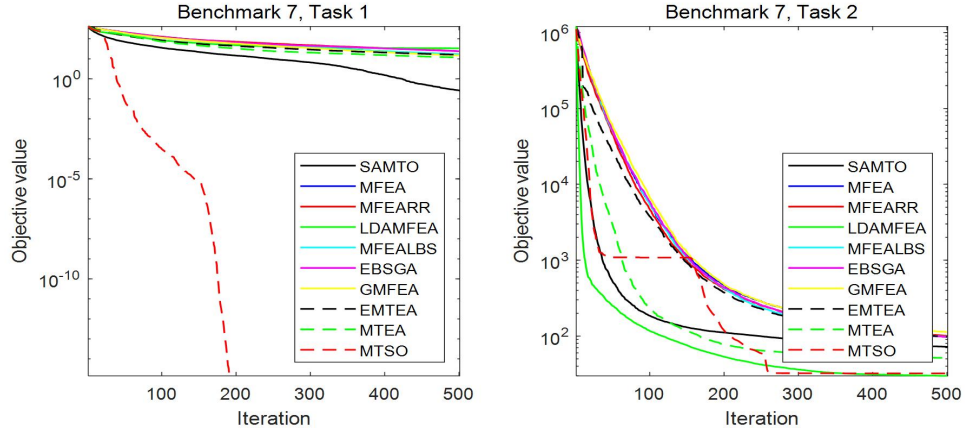

(g)

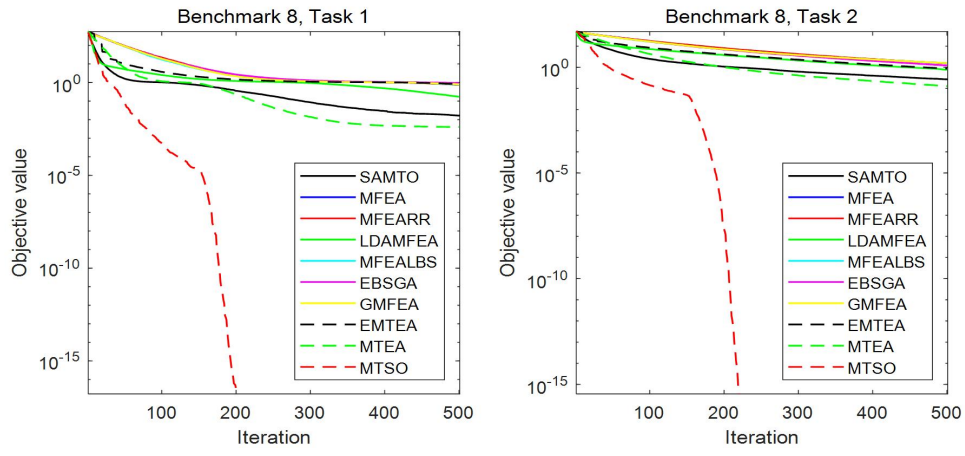

(h)

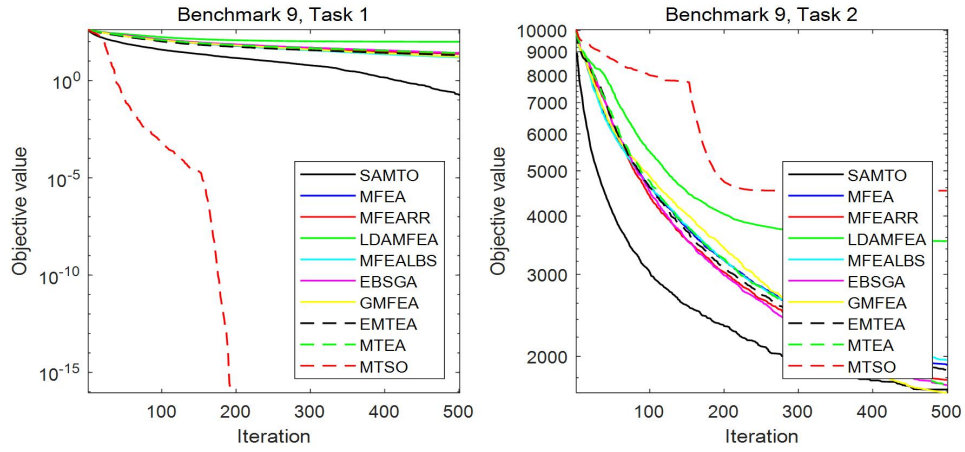

(i)

**Supplemental Figure S2** Error bars for 9 sets of multitask benchmark test functions

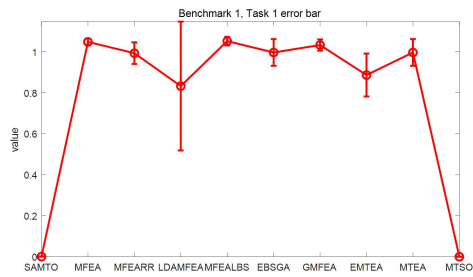

(1a)

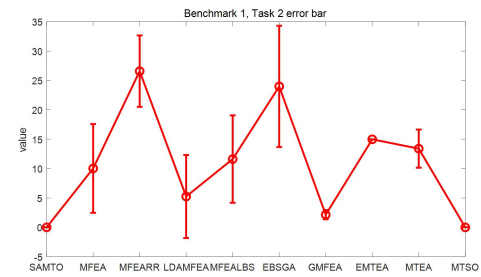

(1b)

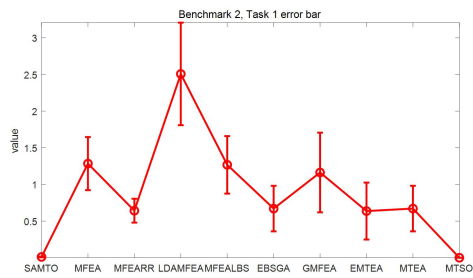

(2a)

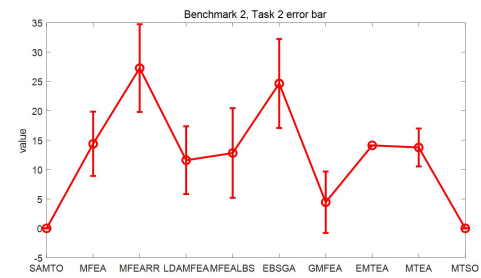

(2b)

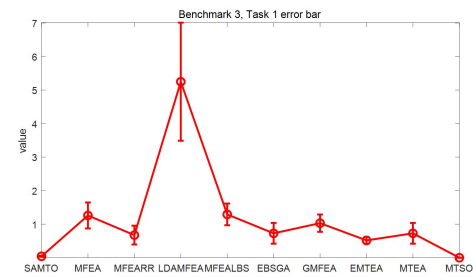

(3a)

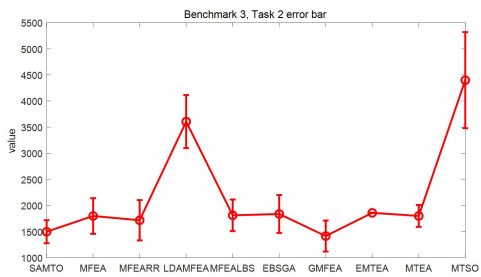

(3b)

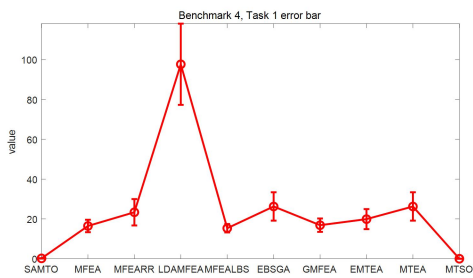

(4a)

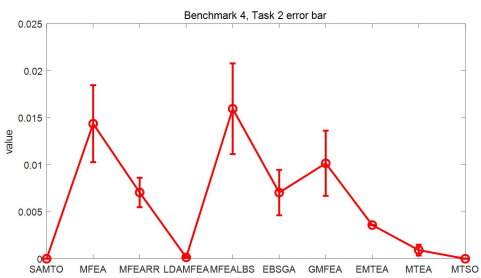

(4b)

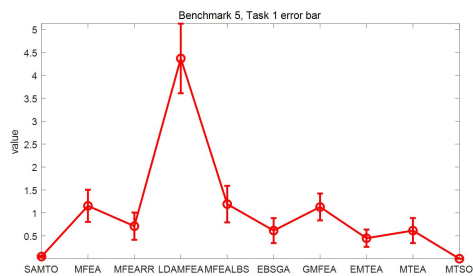

(5a)

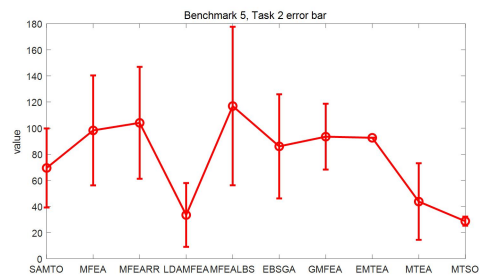

(5b)



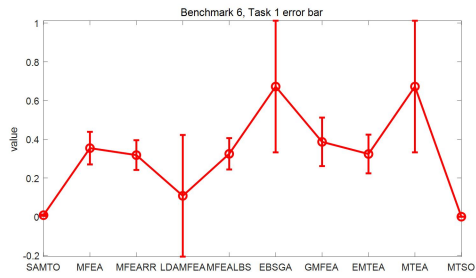

(6a)

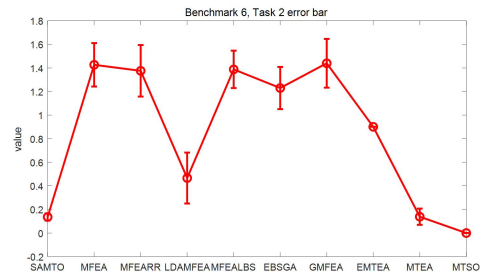

(6b)

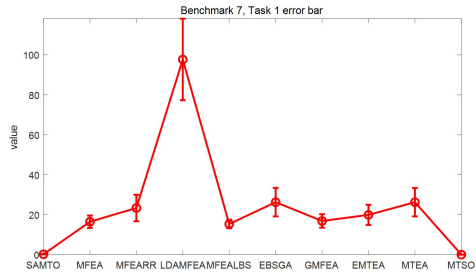

(7a)

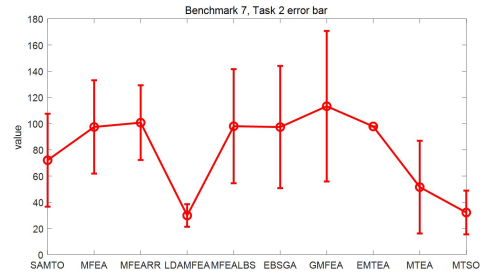

(7b)

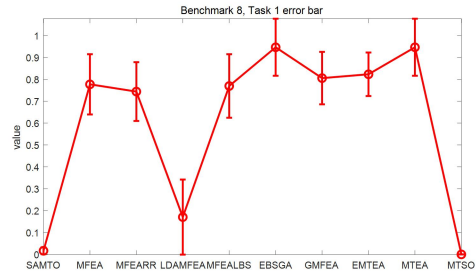

(8a)

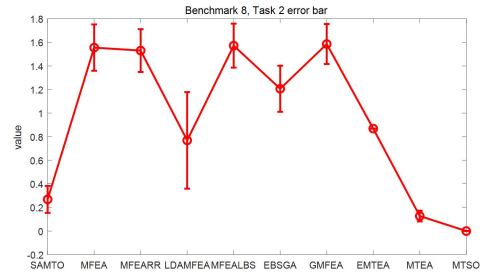

(8b)

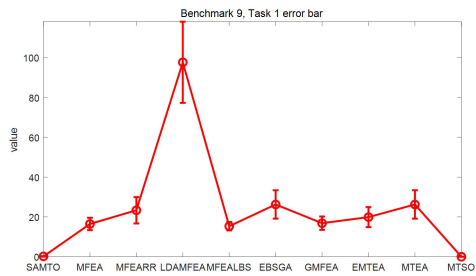

(9a)

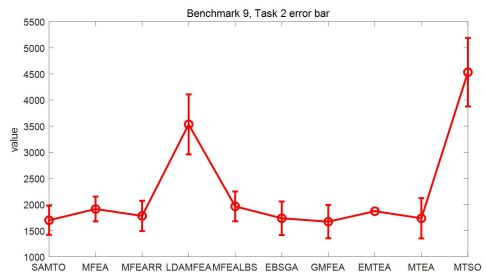

(9b)

**Supplemental Figure S3** Noise Test Function Convergence curve plots for 9 sets of multitask benchmark test functions

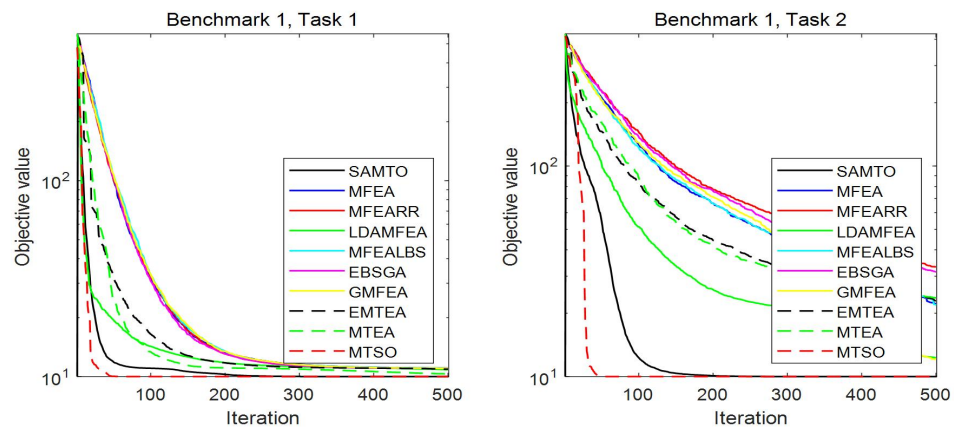

(a)

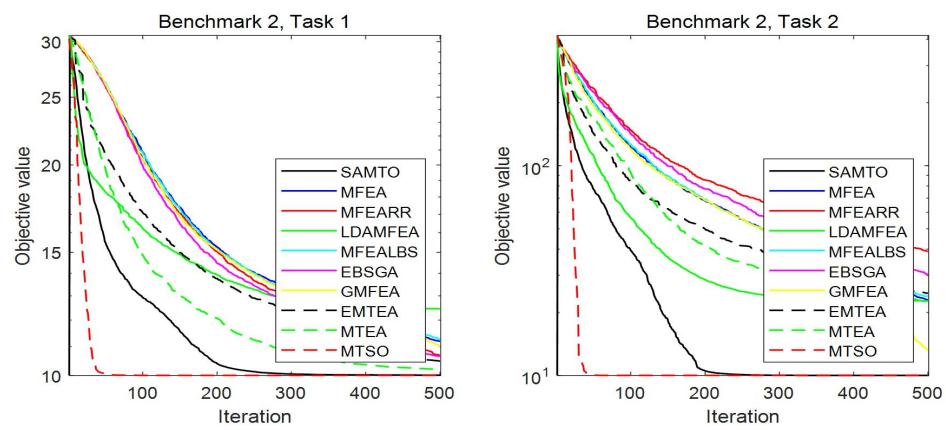

(b)

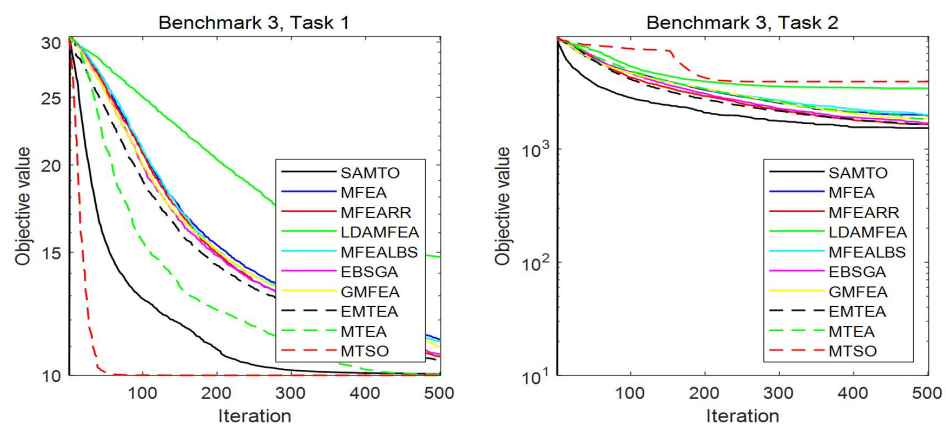

(c)

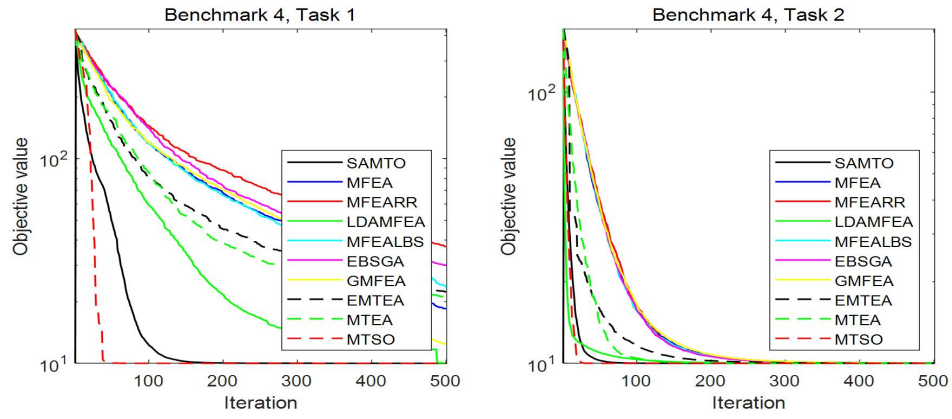

(d)

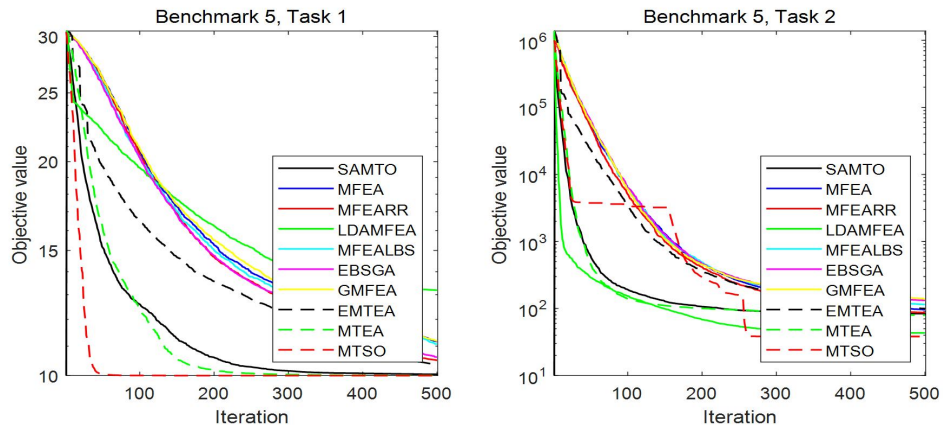

(e)

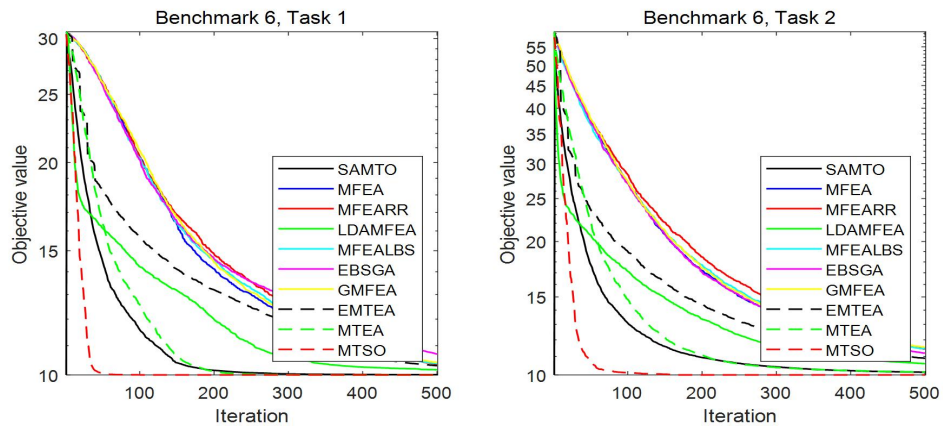

(f)

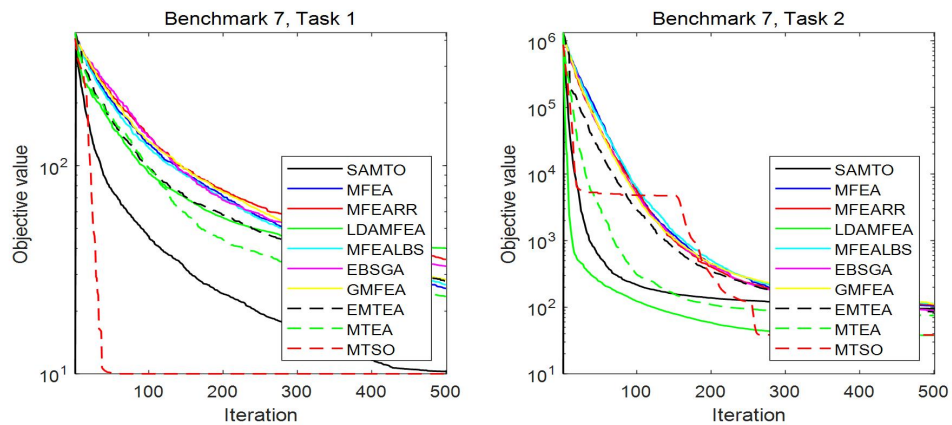

(g)

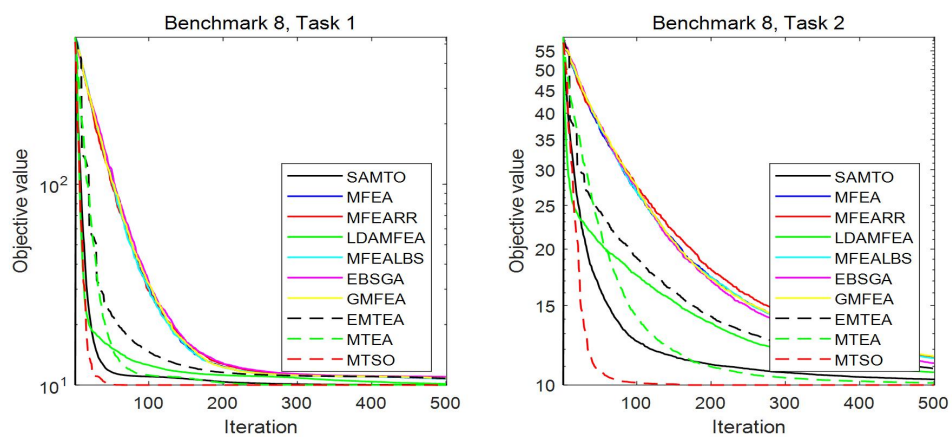

(h)

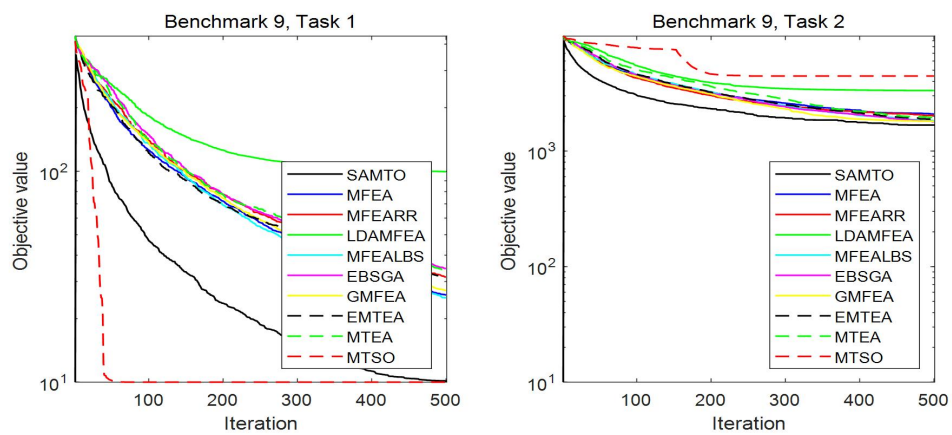

(i)

**Supplemental Figure S4** The error bar chart for the 9 sets of noisy multitask benchmark test functions

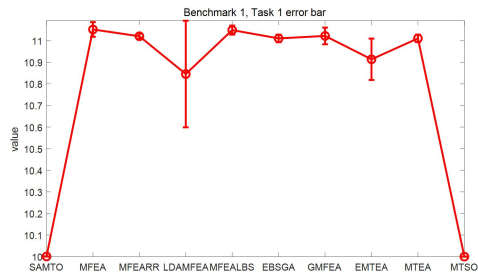

(1a)

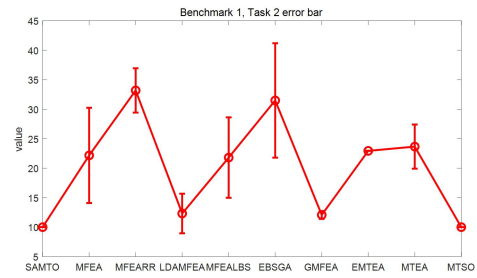

(1b)

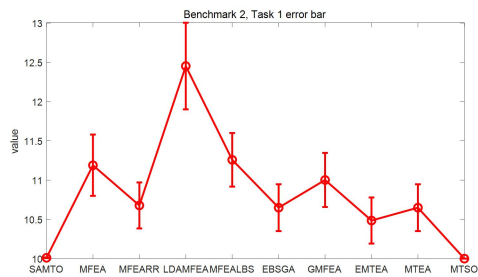

(2a)

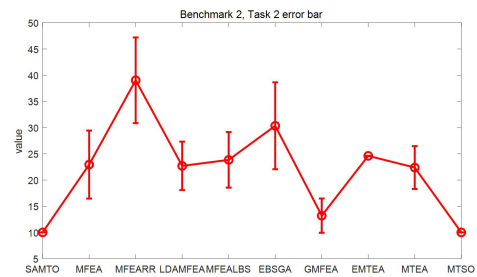

(2b)

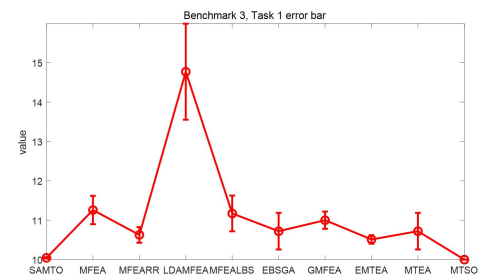

(3a)

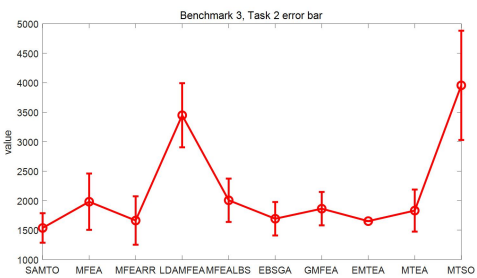

(3b)

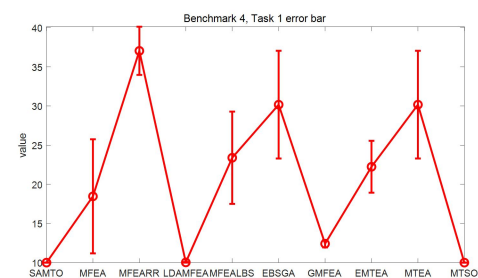

(4a)

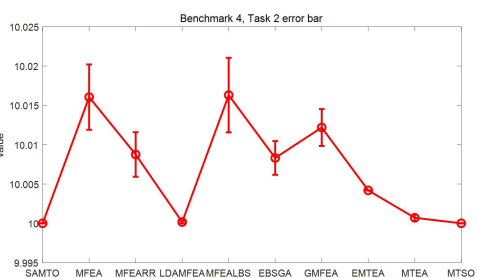

(4b)

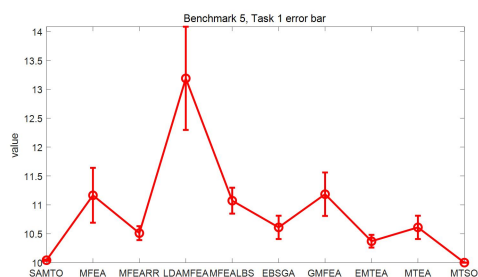

(5a)

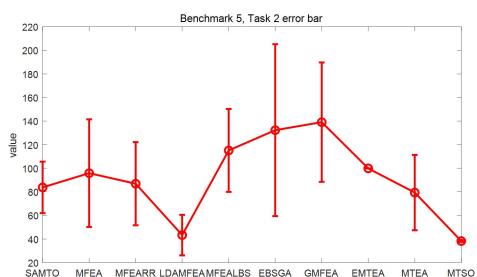

(5b)

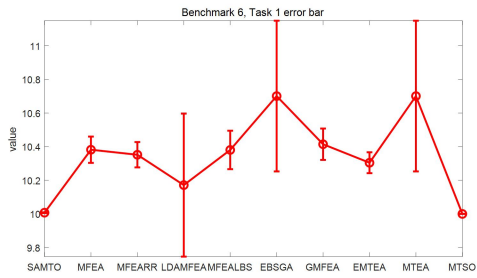

(6a)

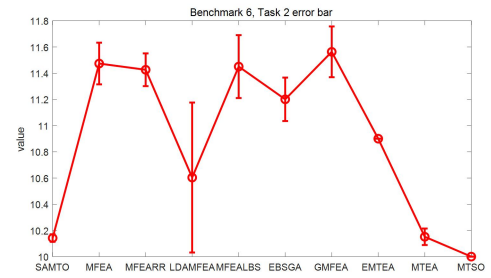

(6b)

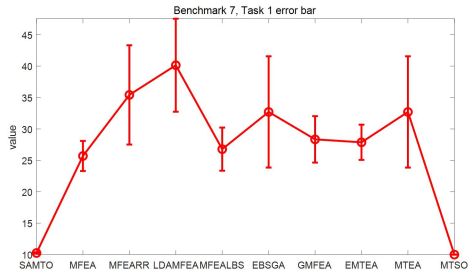

(7a)

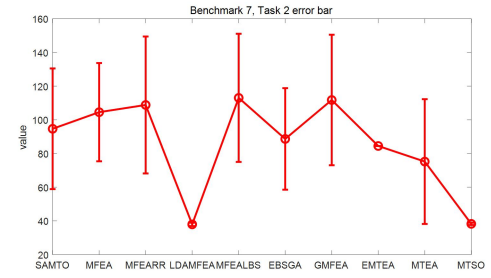

(7b)

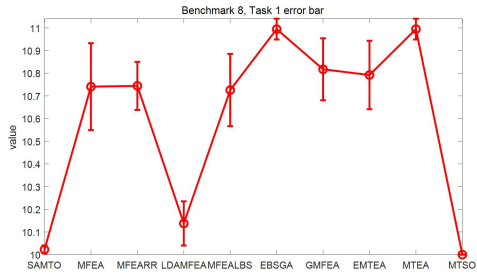

(8a)

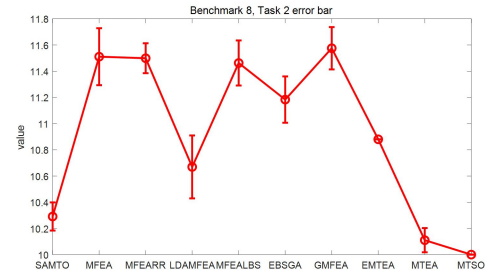

(8b)

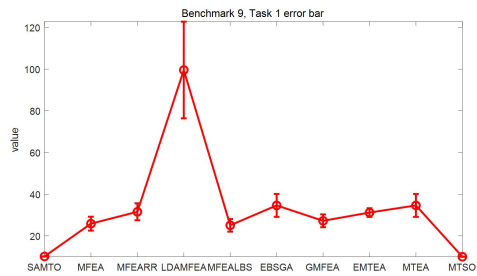

(9a)

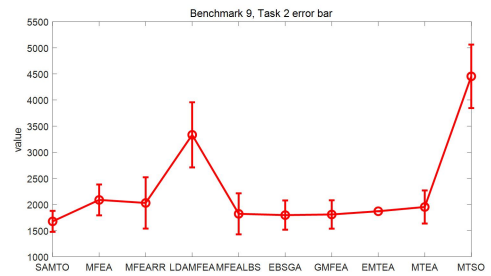

(9b)



**Supplemental Figure S5 Knowledge Transfer Status During the Iterative Process**

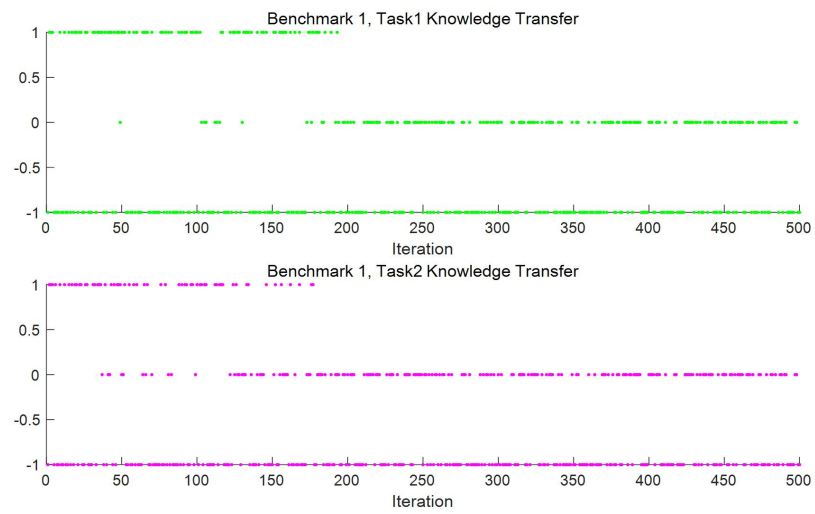

(1)

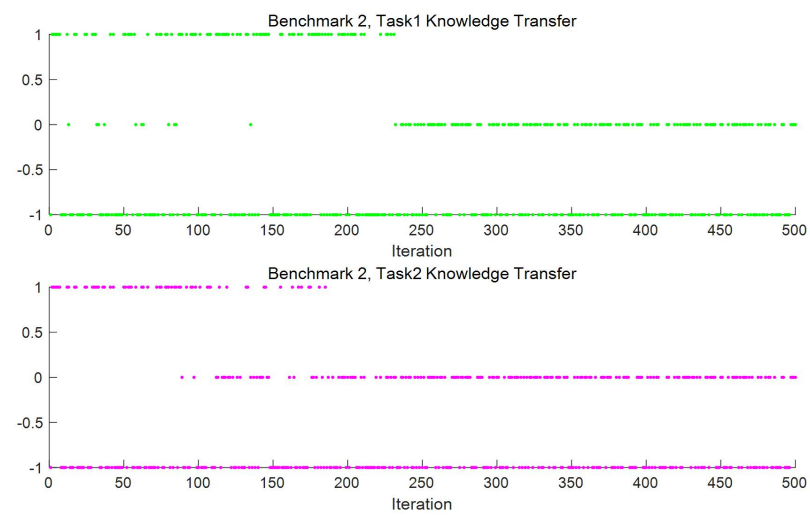

(2)

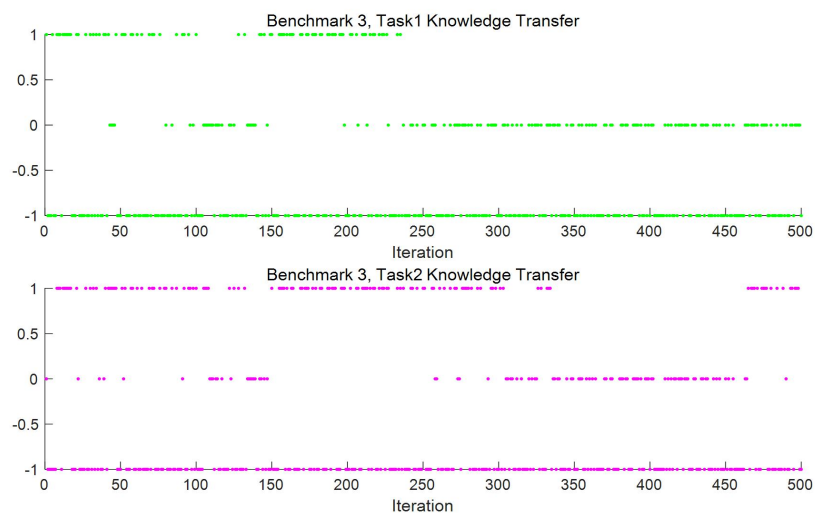

(3)

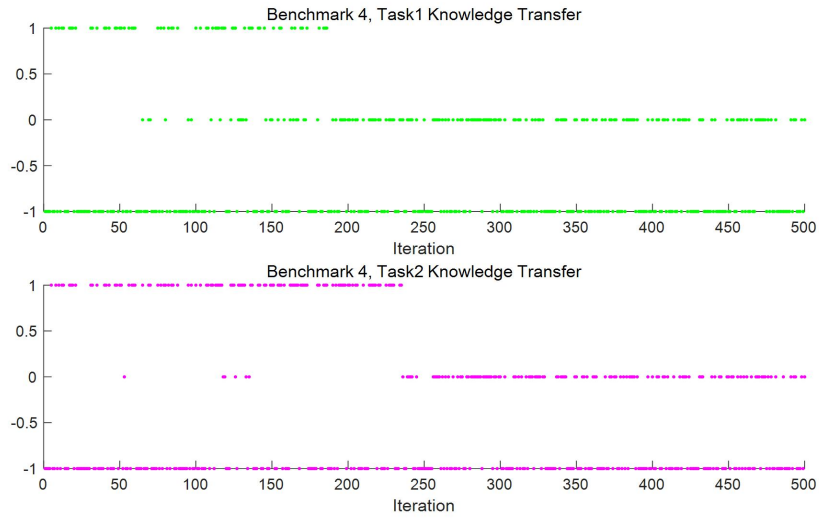

(4)

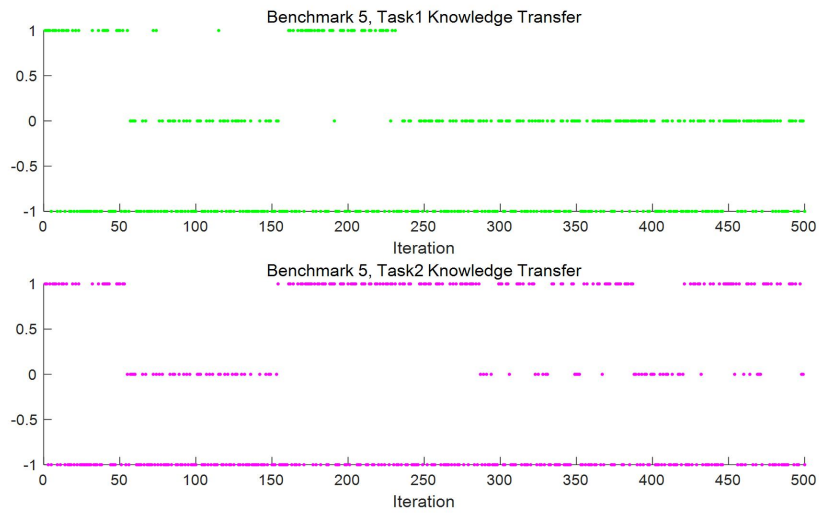

(5)

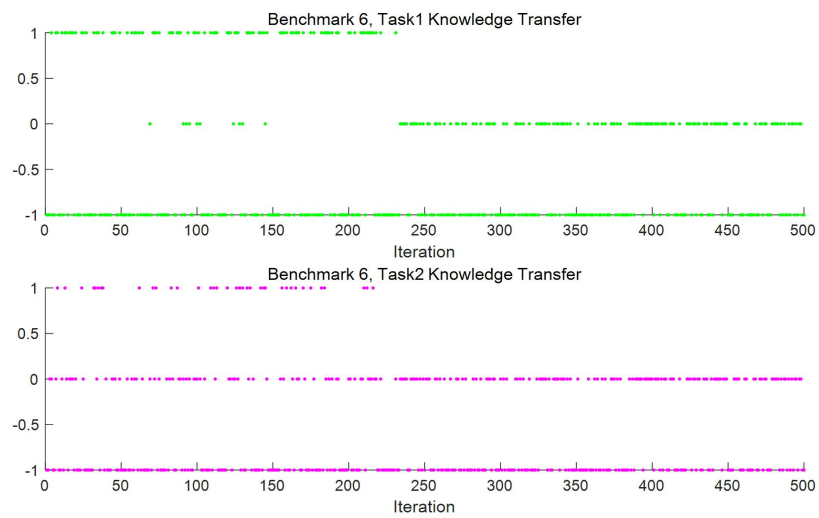

(6)

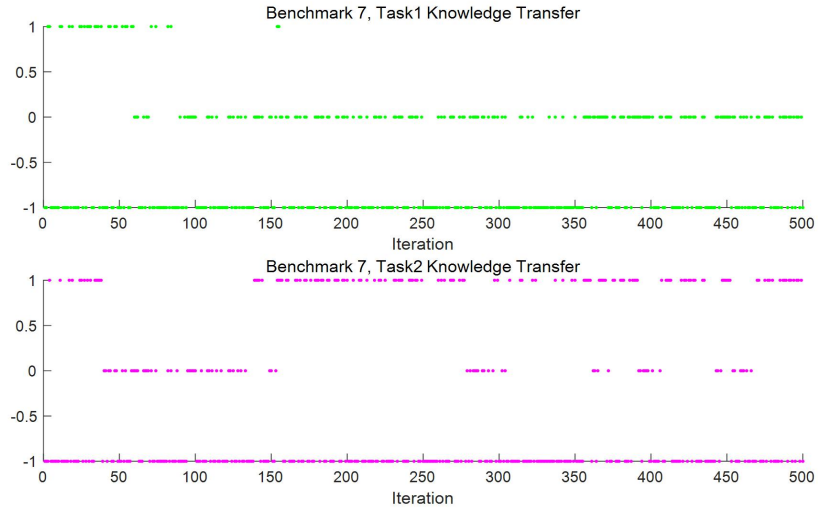

(7)

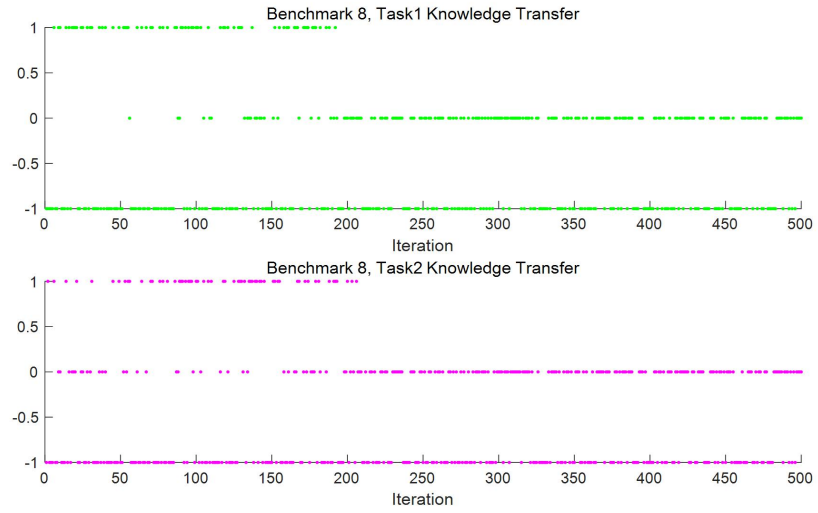

(8)

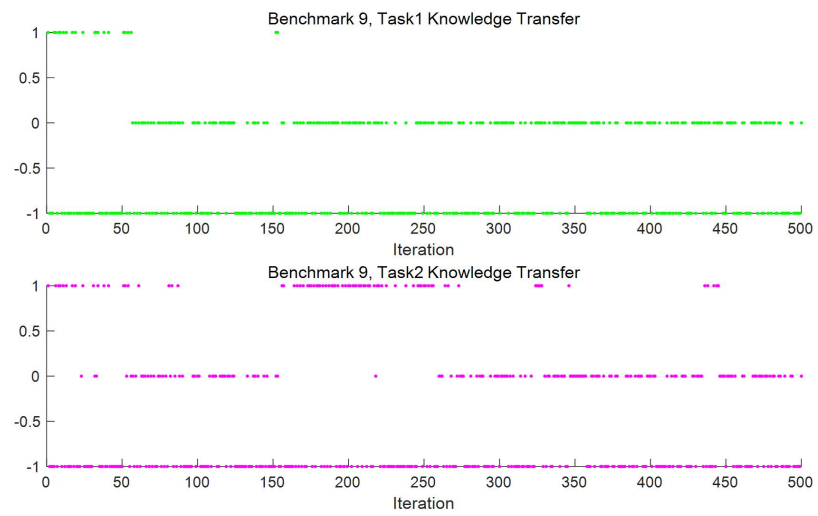

(9)

**Supplemental Figure S6** Schematic Diagram of the PKACP for Two Tasks. Task 1 (a), Task 2 (b)

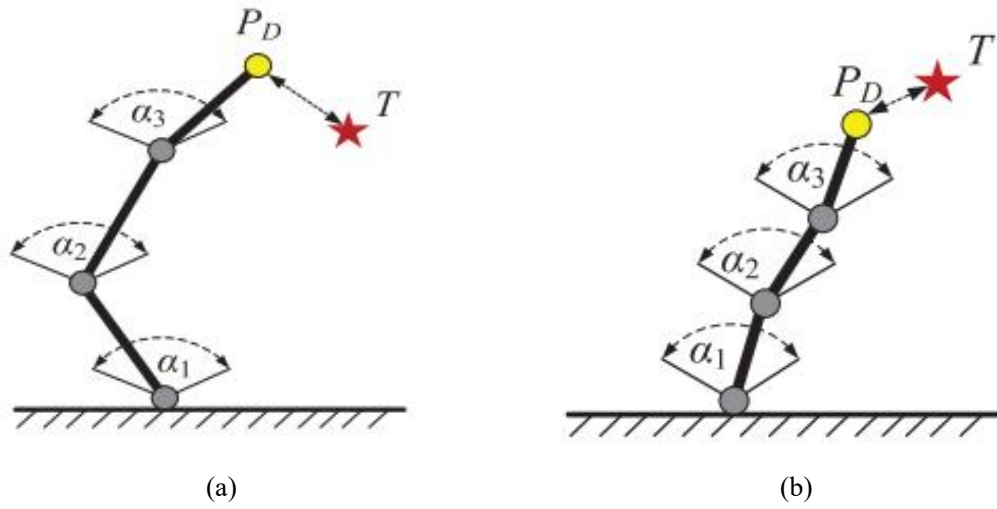

**Supplemental Figure S7** Average convergence curve (a) and error bar (b) for the PKACP with 5 tasks in 5 dimensions

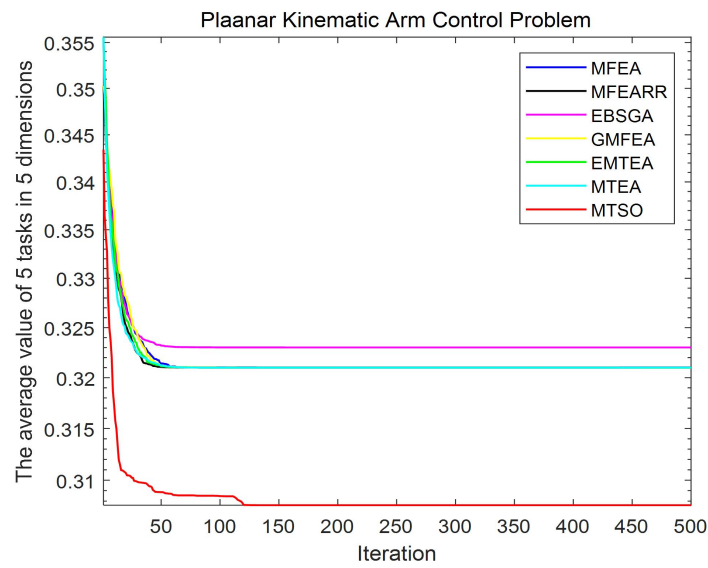

(a)

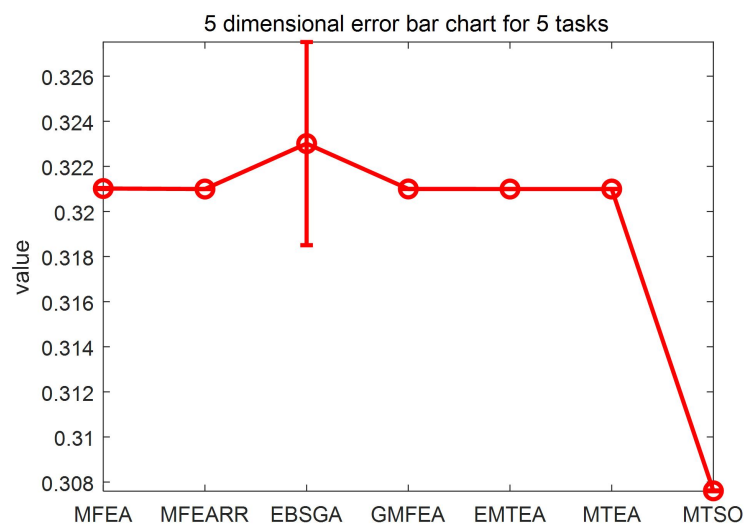

(b)

**Supplemental Figure S8** Average convergence curve(a) and error bar (b) for the PKACP with 5 tasks in 10 dimensions

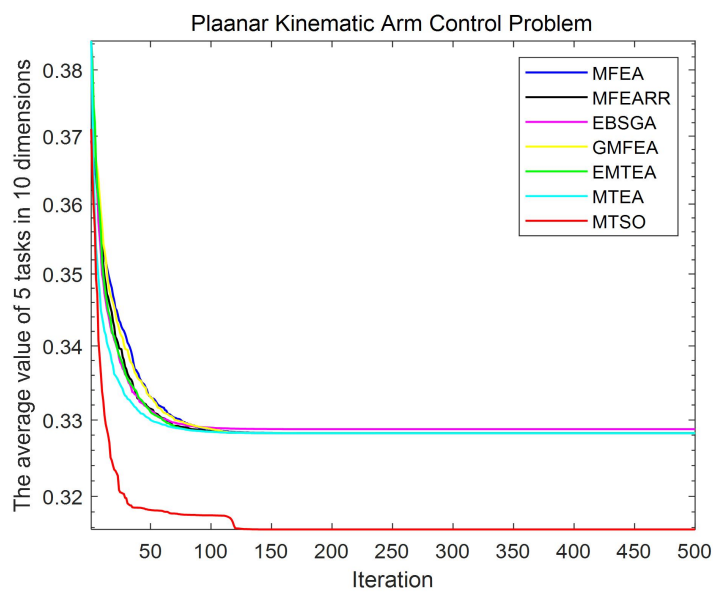

(a)

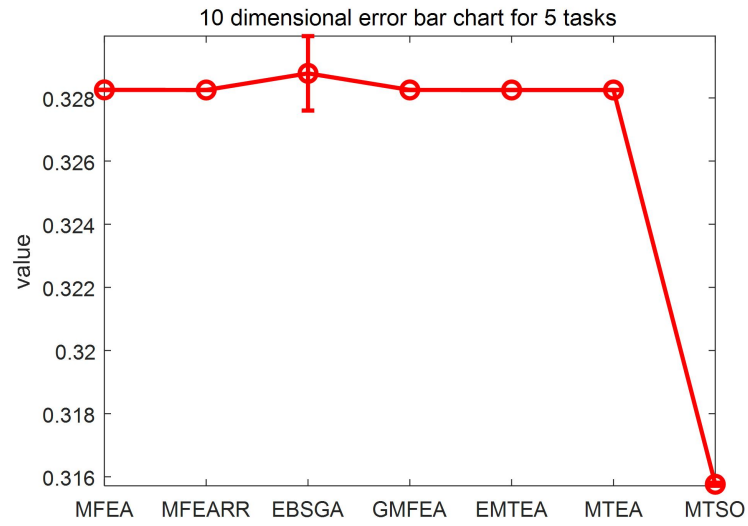

(b)

**Supplemental Figure S9** Average convergence curve (a) and error bar (b) for the PKACP with 5 tasks in 20 dimensions

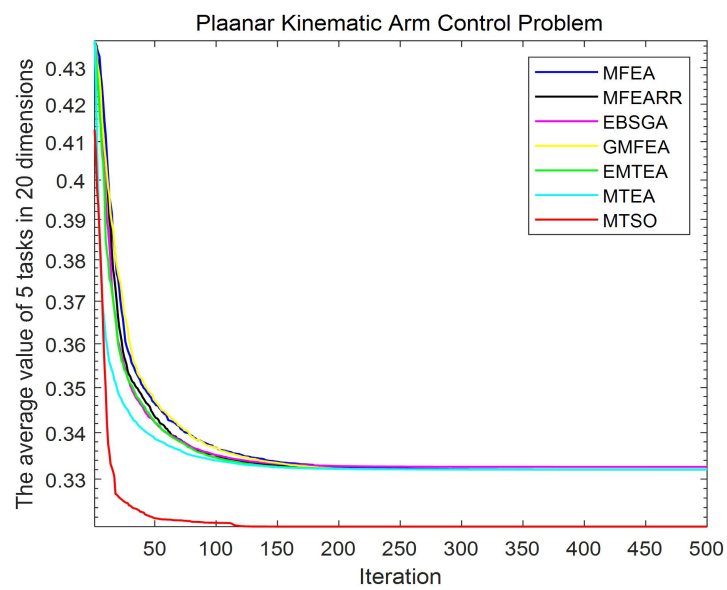

(a)



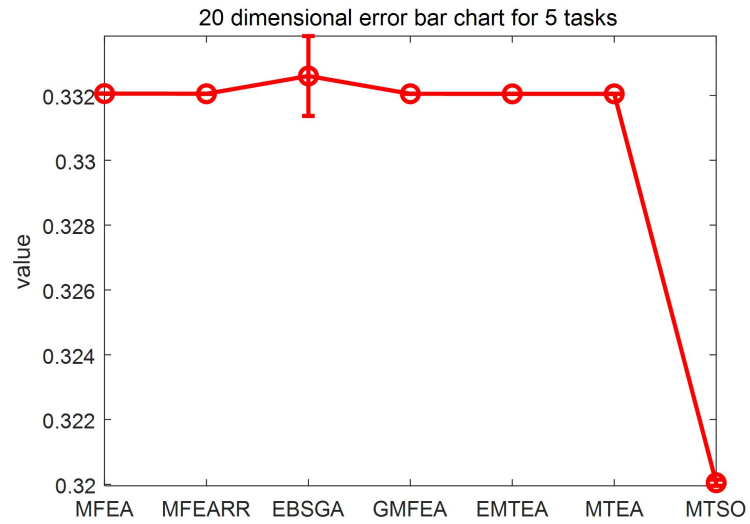

(b)

**Supplemental Figure S10** Average convergence curve (a) and error bar(b) for the PKACP with 10 tasks in 5 dimensions

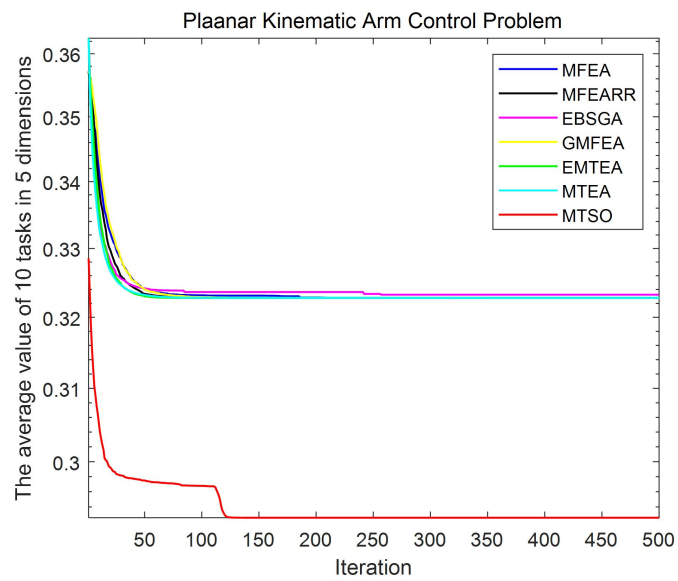

(a)

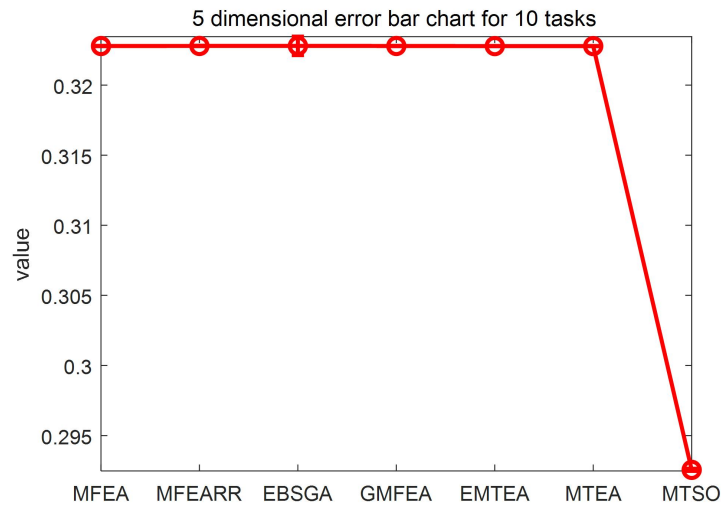

(b)

**Supplemental Figure S11** Average convergence curve (a) and error bar(b) for the PKACP with 10 tasks in 10 dimensions

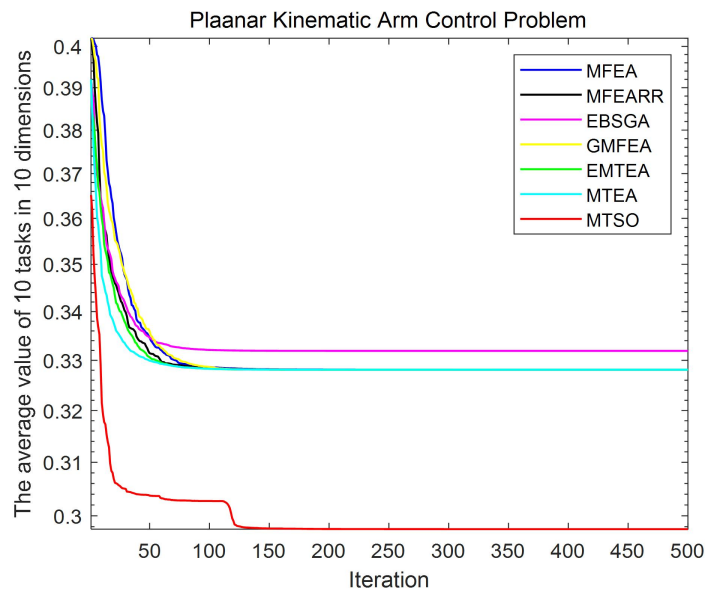

(a)

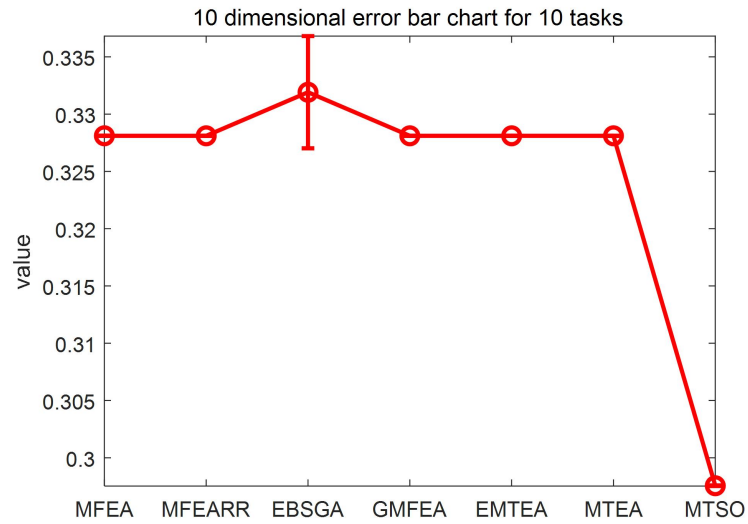

(b)

**Supplemental Figure S12** Average convergence curve (a) and error bar(b) for the PKACP with 10 tasks in 20 dimensions

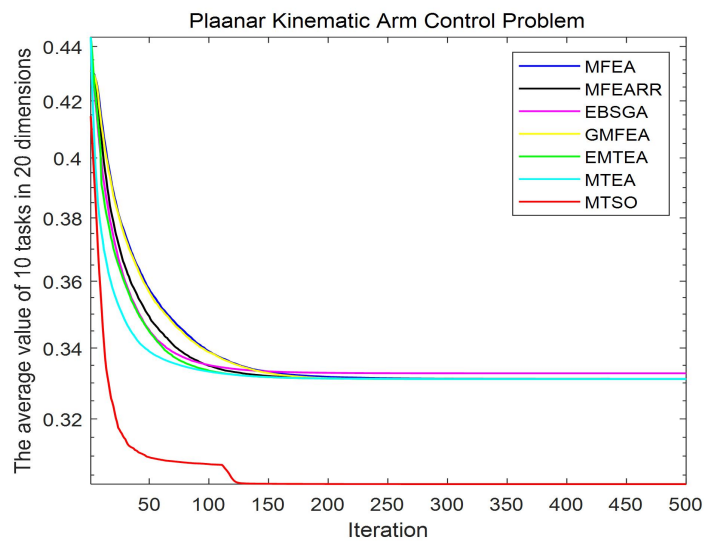

(a)

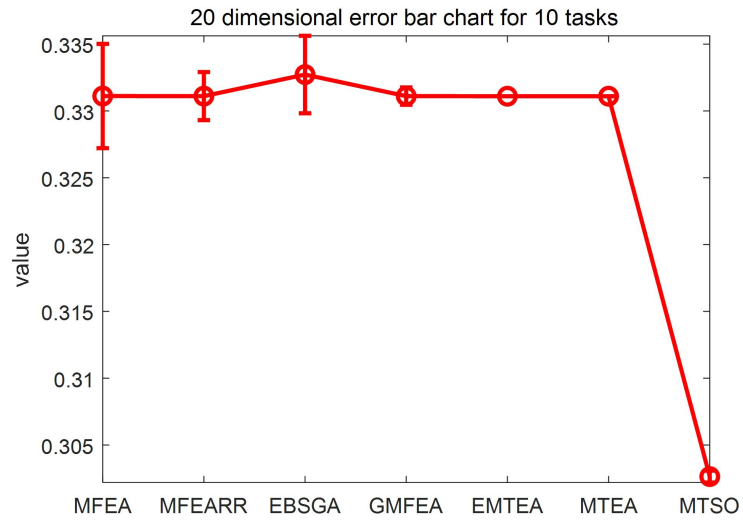

(b)

**Supplemental Figure S13** Average convergence curve(a) and error bar(b) for the robot gripper design problem

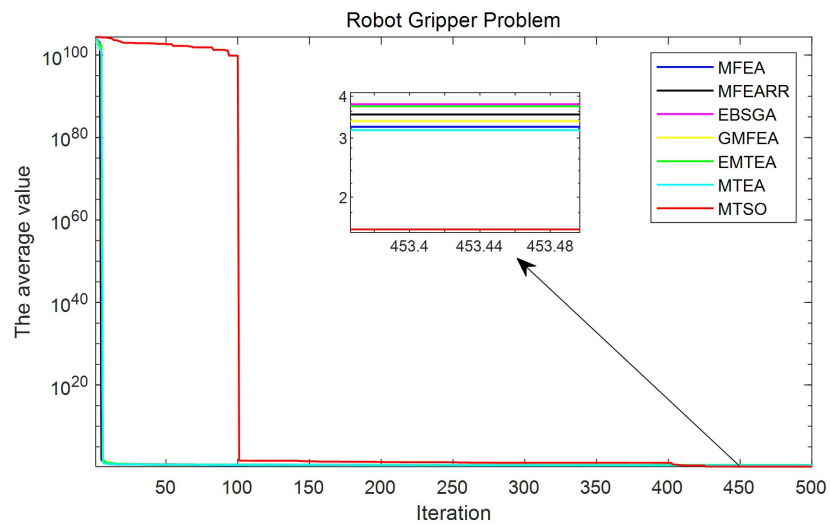

(a)

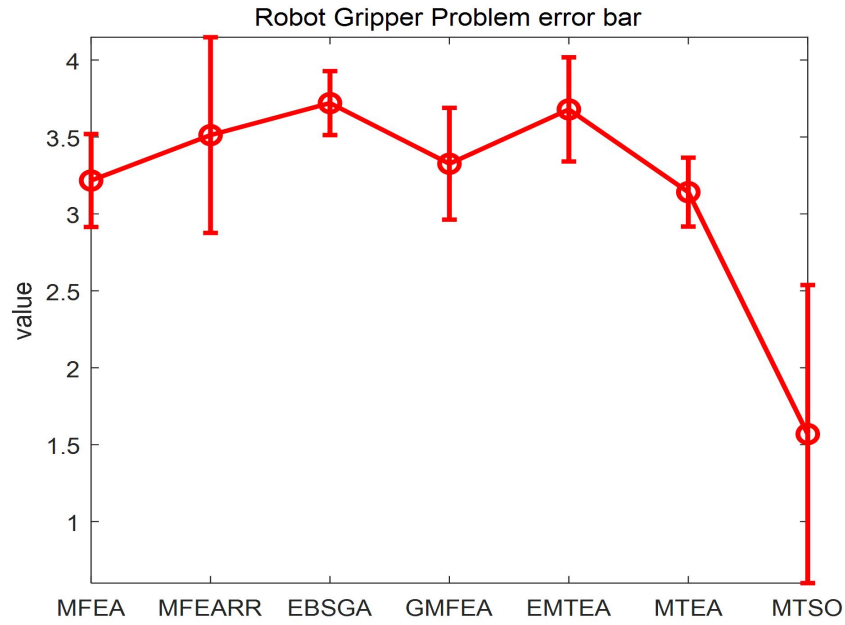

(b)

**Supplemental Figure S14** Average convergence curve(a) and error bar(b) for the car side impact design problem

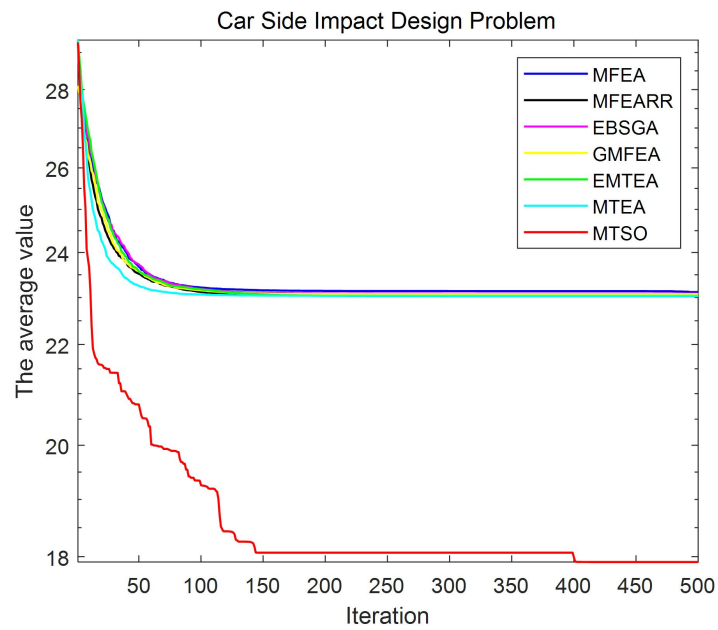

(a)

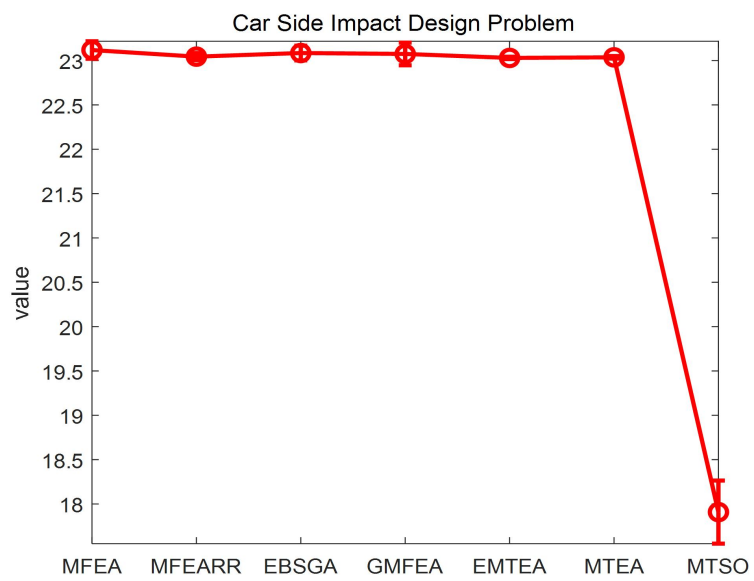

(b)
